# Supplementary material for: Insight in Genome-Wide Association of Metabolite Quantitative Traits by Exome Sequence Analyses
Source: PLOS journal article supplement (doi:10.1371/journal.pgen.1004835), 2015-01-08

## Supplementary Figure 2. Regional plots of the GWAS loci

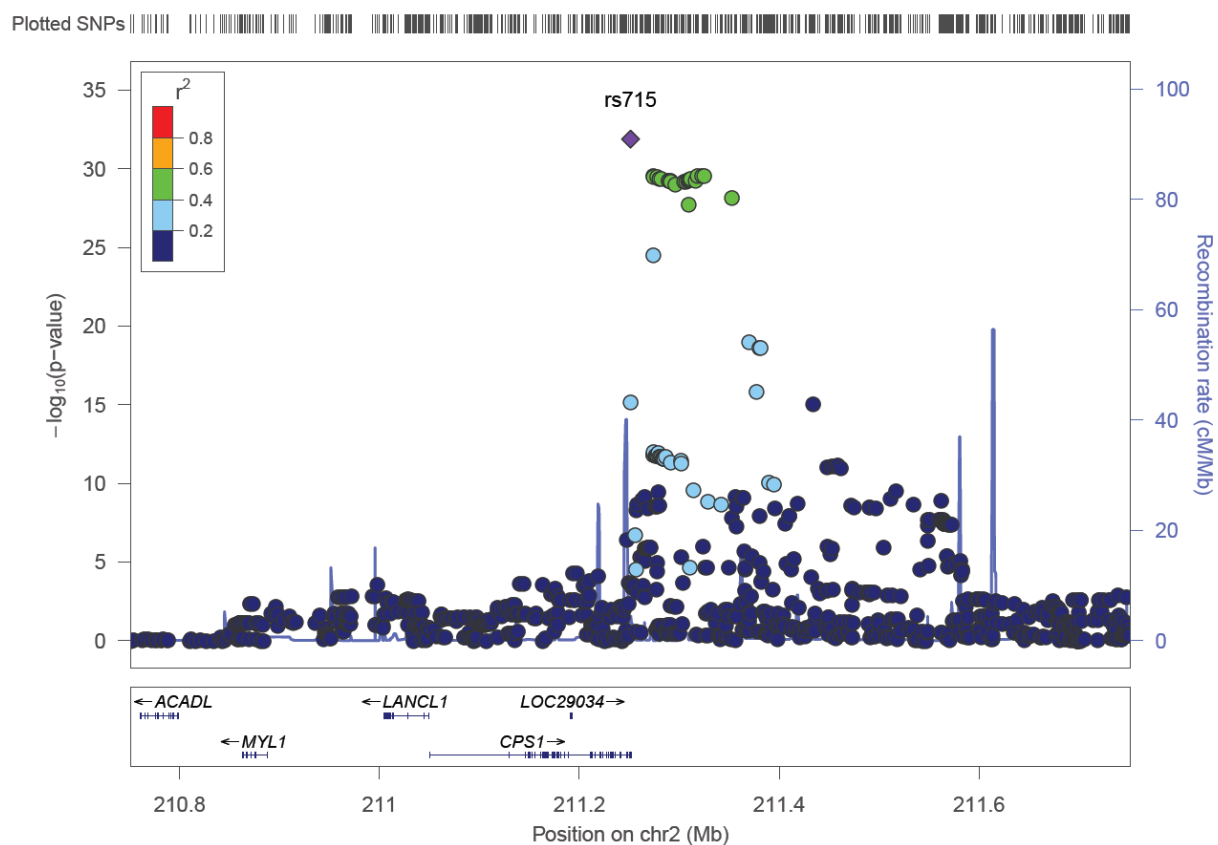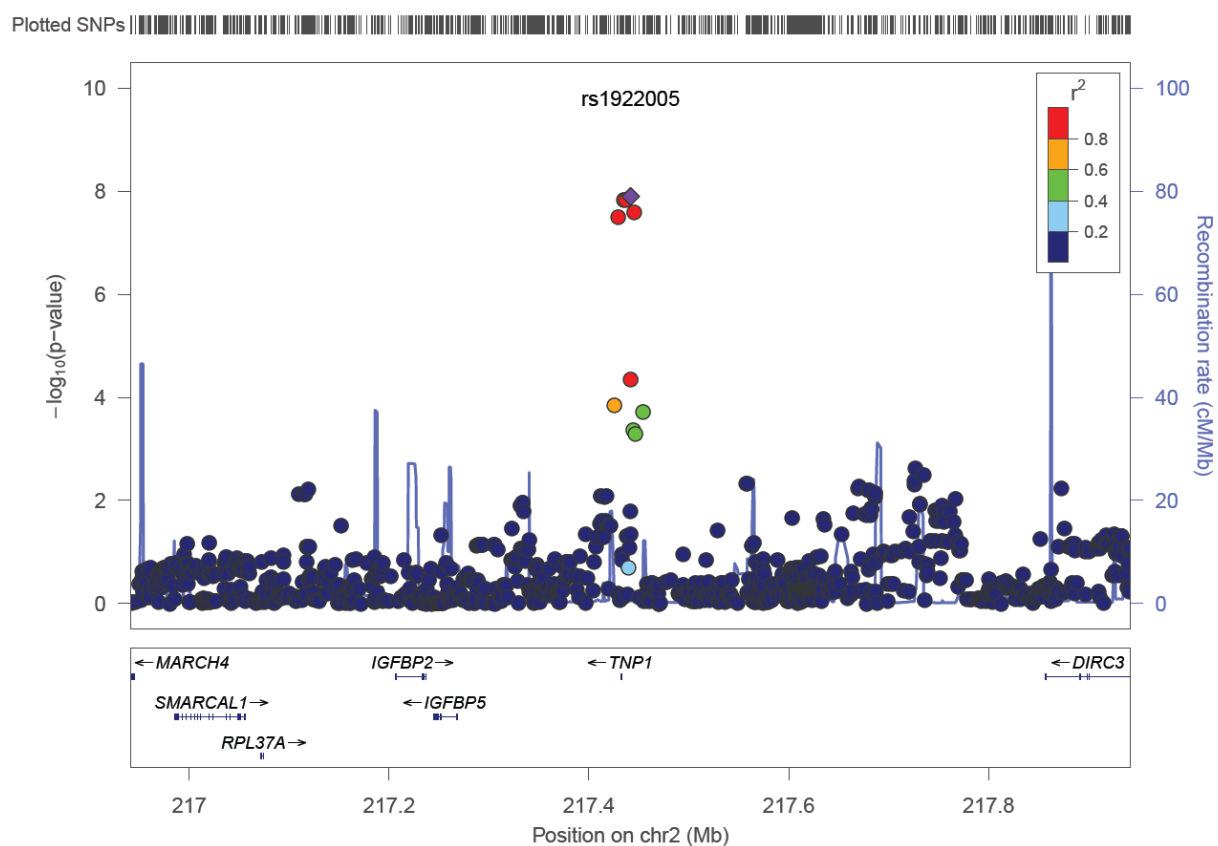

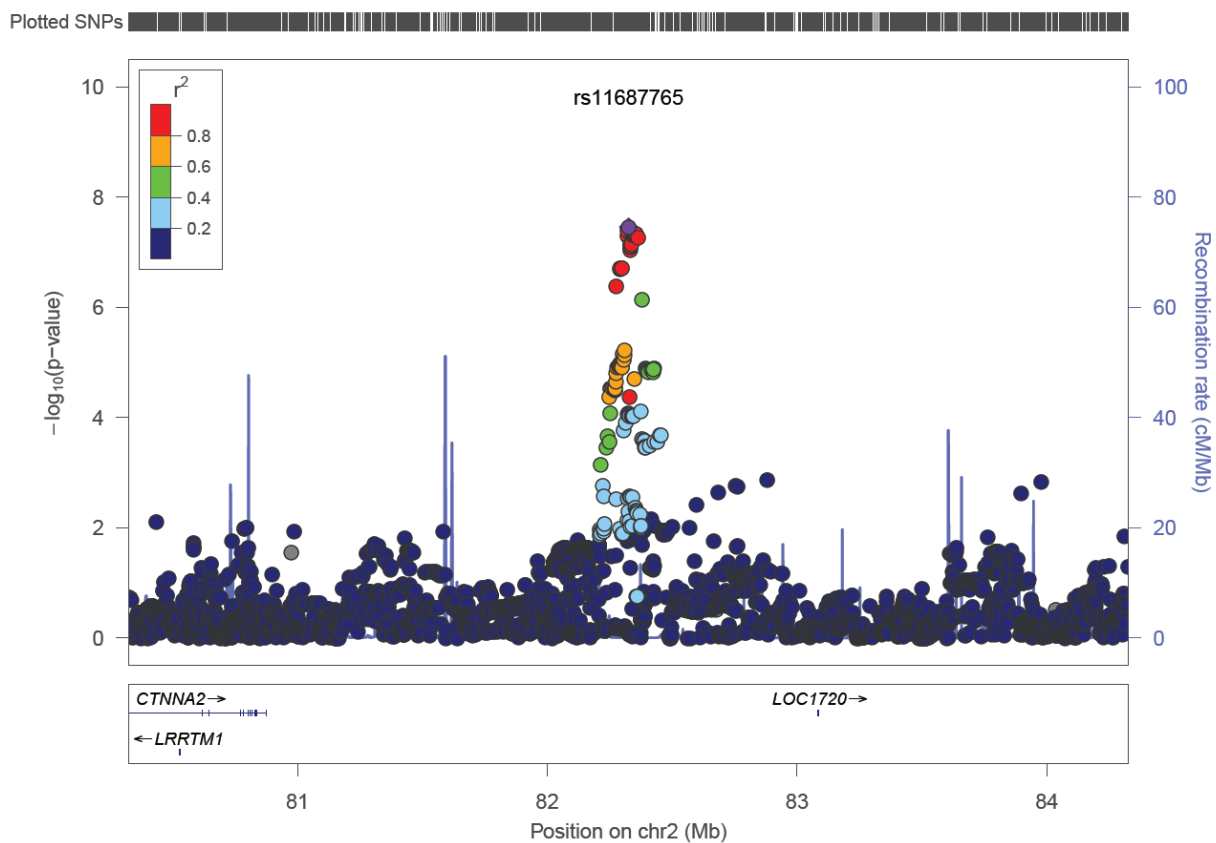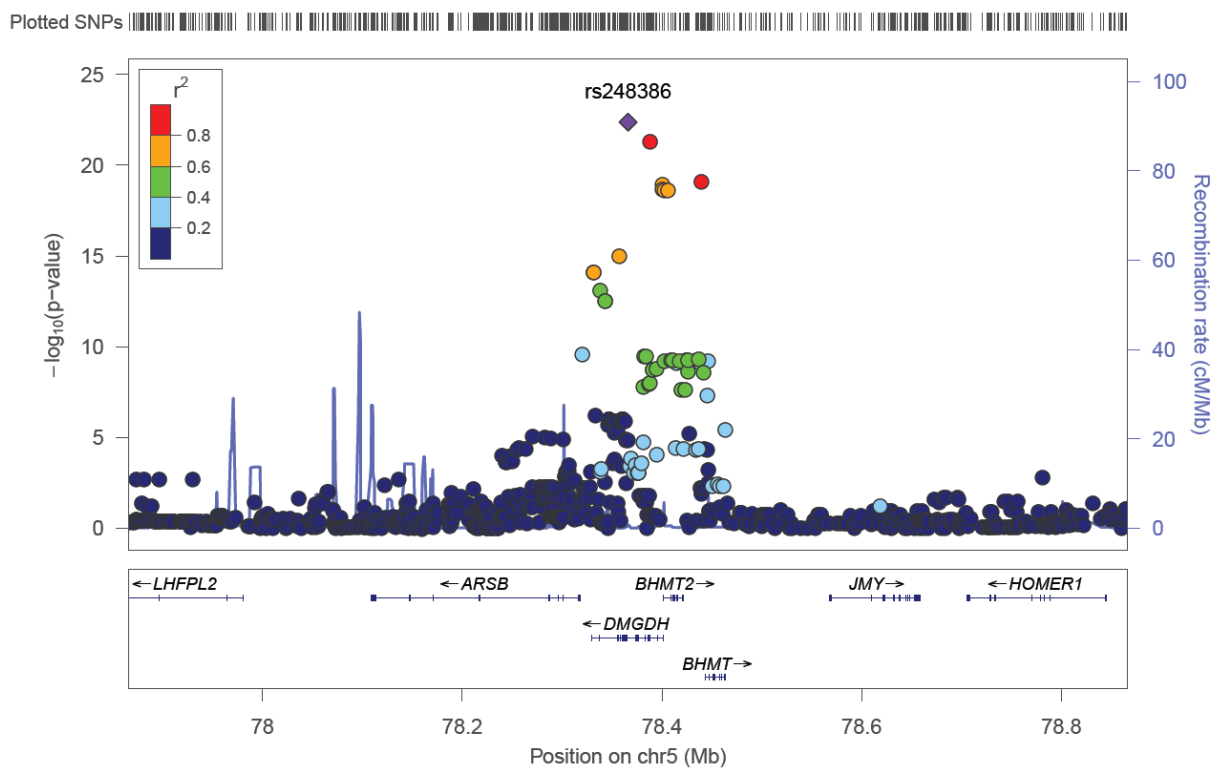

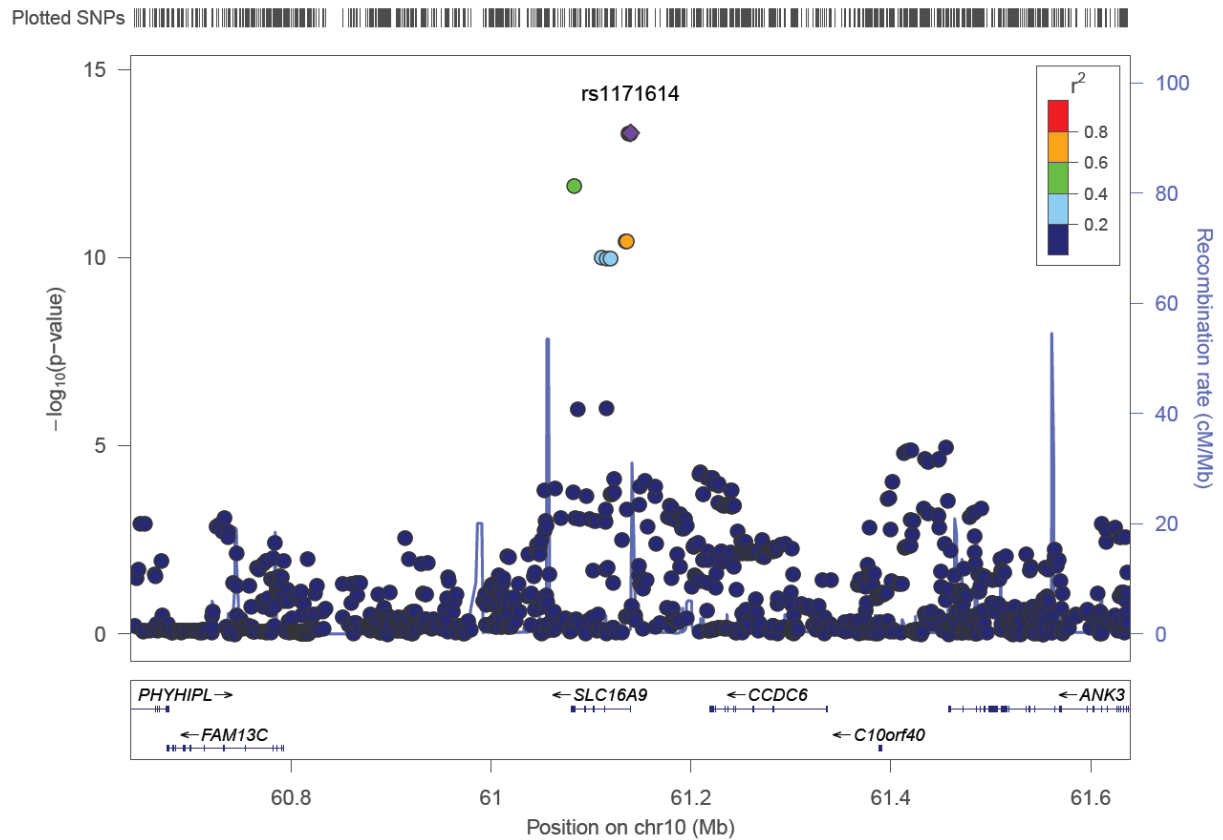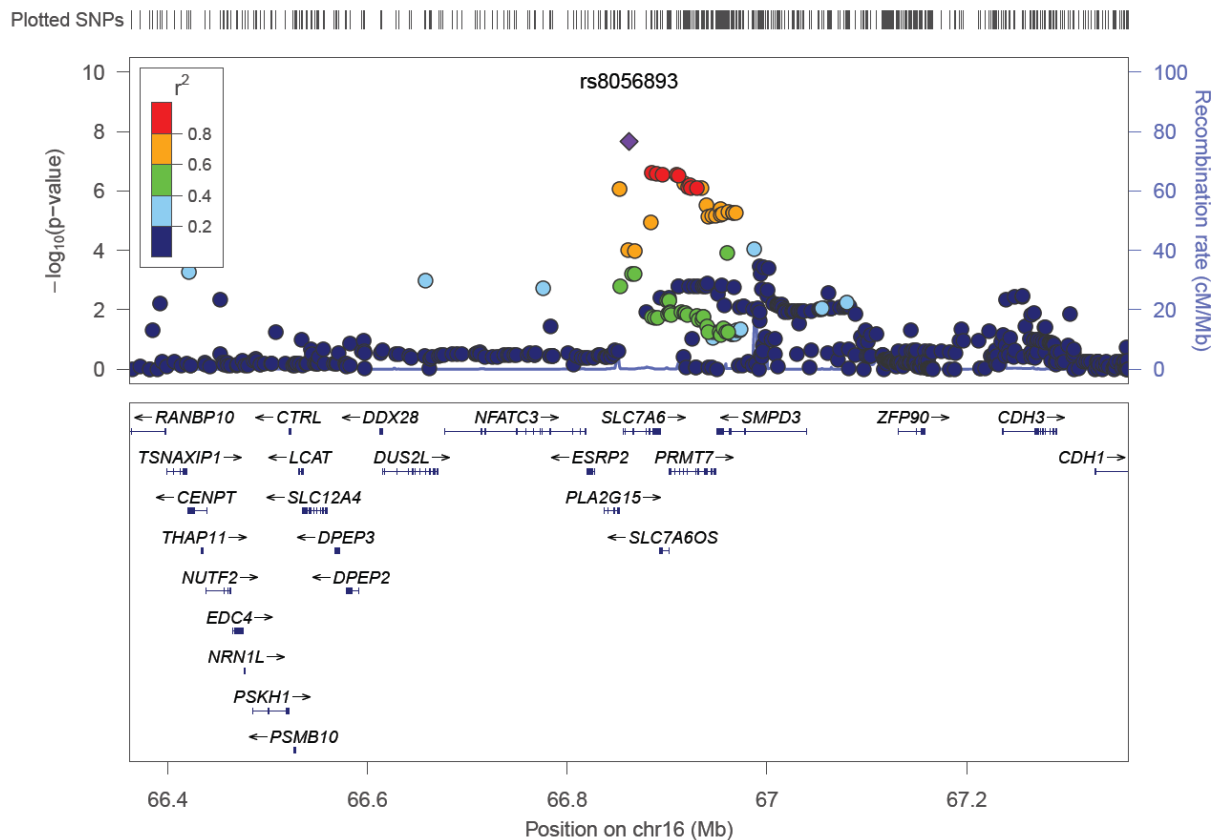

Plotted SNPs

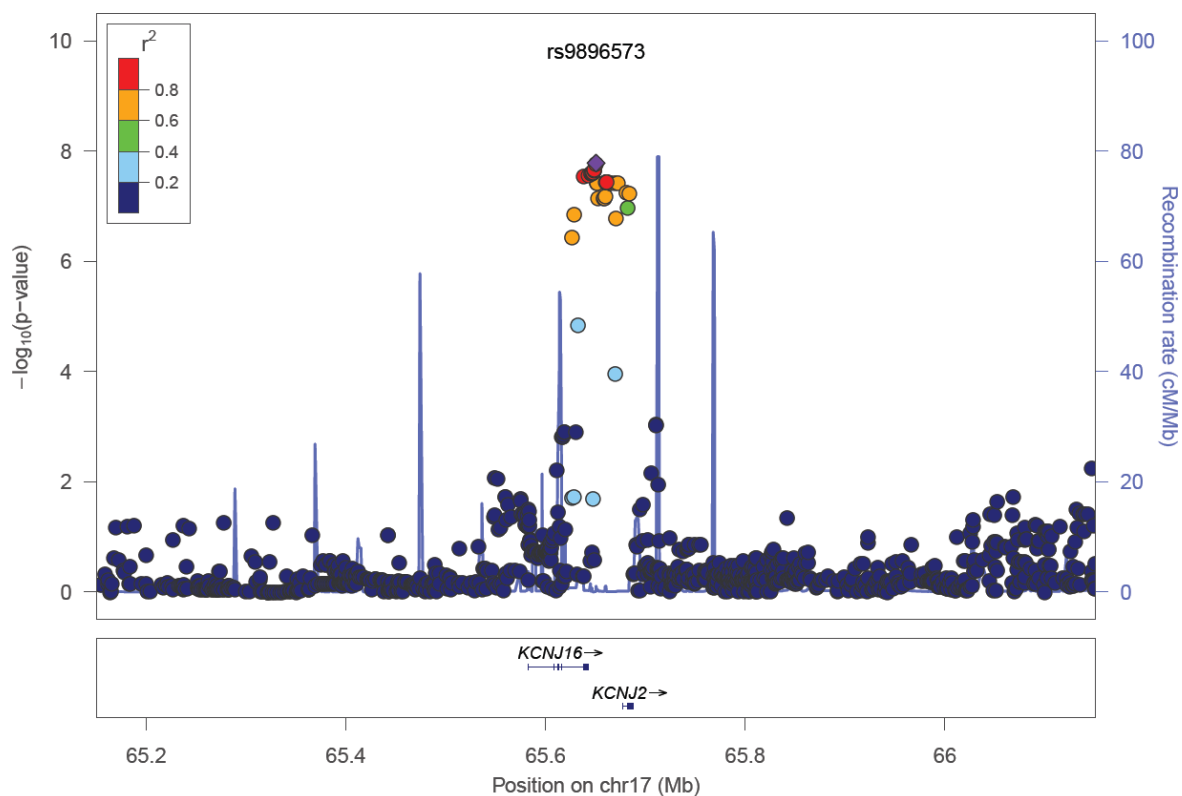

Plotted SNPs

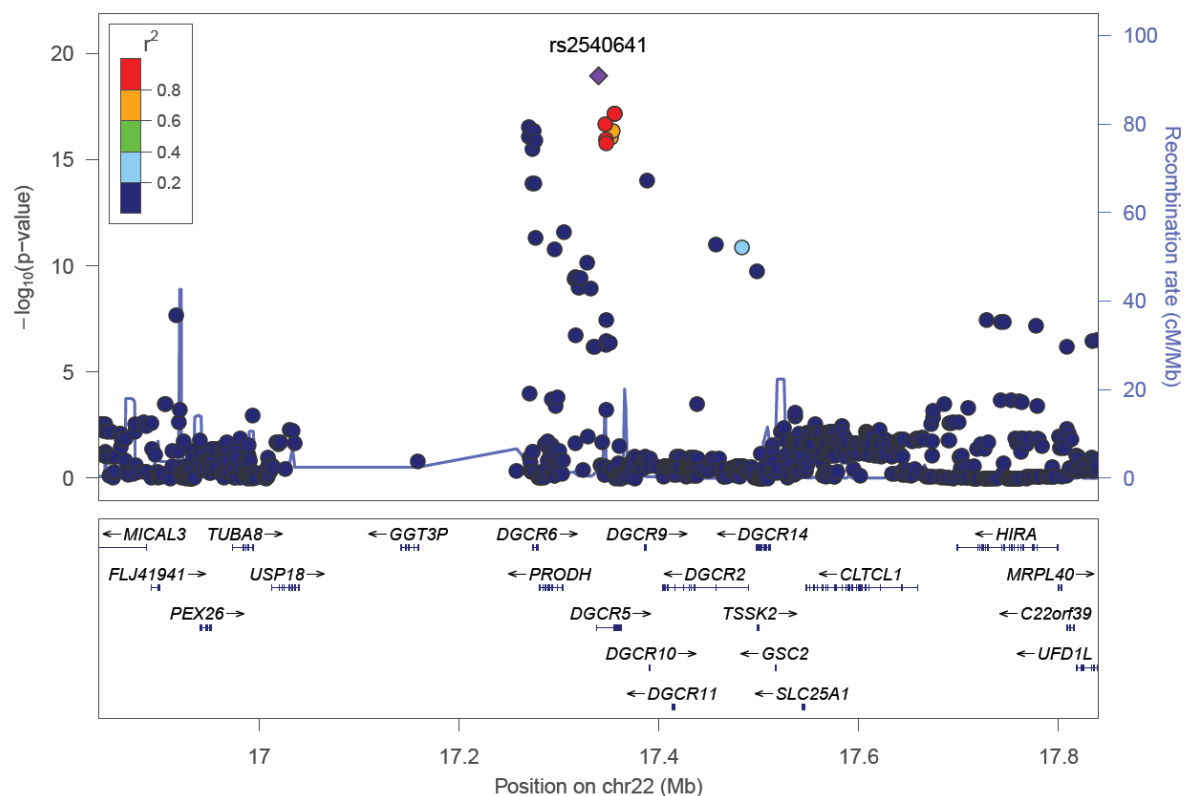

Supplement: S2 (10.1371/journal.pgen.1004835.s002) [file journal.pgen.1004835.s002]
