# Supplementary material for: Insight in Genome-Wide Association of Metabolite Quantitative Traits by Exome Sequence Analyses
Source: PLoS Genet. 2015 Jan 8;11(1):e1004835. doi: 10.1371/journal.pgen.1004835 (PMC4287344; doi:10.1371/journal.pgen.1004835)
Supplement: S3 Table — Results from exome sequence association study. (XLS) [file pgen.1004835.s007.xls]

## Sheet: exome sequence ERF GWAS
SNP	CHR	Position	A1	A2	Beta	SE	P-value a	FUNCTION	GENE	MAF	Trait	P-value b	P-value c	Bonferroni based threshold for significance
rs2286963	2	211060050	T	G	-0.0425817	0.050569	0.415291	missense	ACADL	0.397171	glycine	0.695474	1.38223e-19	0.0016129
rs3764913	2	211074909	T	C	-0.0462855	0.0506217	0.376398	intron	ACADL	0.397554	glycine	0.632298	1.41233e-19
rs72990900	2	211082539	G	A	0.128398	0.092744	0.180463	intron	ACADL	0.0775994	glycine	0.822442	2.73751e-19
rs61731470	2	211085491	G	A	-0.0876411	0.0834014	0.309344	missense	ACADL	0.0940367	glycine	0.745761	1.61722e-19
rs17552879	2	211342502	G	A	0.0591697	0.0509365	0.261102	intron	CPS1	0.467125	glycine	0.972526	2.06459e-19
rs147937942	2	211421429	T	G	-0.444347	0.176518	0.0148803	intron	CPS1	0.0194954	glycine	3.94931e-05	4.33771e-22
rs78365831	2	211442306	C	T	0.298775	0.141799	0.0396262	intron	CPS1	0.0309633	glycine	0.268769	5.58027e-19
rs116468978	2	211452704	T	C	-0.201509	0.15392	0.205326	intron	CPS1	0.0244648	glycine	0.616169	1.98366e-19
rs182548513	2	211455113	G	C	-0.479356	0.174664	0.00793024	intron	CPS1	0.0181607	glycine	2.55213e-05	6.33935e-22
rs1047883	2	211456637	G	A	0.12993	0.0522283	0.0160984	missense	CPS1	0.359709	glycine	0.738218	1.9192e-18
rs2229589	2	211456639	T	C	0.12993	0.0522283	0.0160984	coding-synonymous	CPS1	0.359709	glycine	0.738218	1.9192e-18
rs143738855	2	211456902	G	A	-0.349598	0.175914	0.0545333	intron	CPS1	0.0199081	glycine	0.000354154	1.13612e-21
rs71422703	2	211460426	A	C	0.191862	0.178568	0.298597	intron	CPS1	0.0157571	glycine	0.591253	1.09704e-19
rs4420657	2	211466829	A	T	-0.175896	0.0777268	0.0285768	intron	CPS1	0.111621	glycine	0.36965	7.00067e-19
rs2277909	2	211470086	T	C	0.222962	0.0767536	0.00495015	intron	CPS1	0.111324	glycine	0.0244276	4.50942e-19
rs2287600	2	211473070	G	T	0.221397	0.072469	0.00312137	intron	CPS1	0.134939	glycine	0.017373	4.83809e-19
rs75395645	2	211476897	C	T	0.29849	0.167436	0.0845935	coding-synonymous	CPS1	0.0206422	glycine	0.396087	3.09208e-19
rs114764732	2	211481033	A	G	0.356849	0.100795	0.000614769	intron	CPS1	0.0626911	glycine	0.00359166	5.52126e-19
rs2287599	2	211481257	G	C	0.142799	0.0520538	0.0079564	coding-synonymous	CPS1	0.366972	glycine	0.532203	3.28346e-18
rs116664530	2	211503856	A	G	0.190214	0.109224	0.0920333	intron	CPS1	0.0489297	glycine	0.0194882	2.91391e-20
rs34449727	2	211514995	G	T	-0.0625145	0.0499896	0.226353	intron	CPS1	0.463657	glycine	0.541841	3.19583e-19
rs3213784	2	211515058	A	T	0.0207201	0.0505772	0.691864	intron	CPS1	0.343272	glycine	0.735046	1.1512e-19
rs141998607	2	211518724	G	A	-0.121592	0.186471	0.528154	intron	CPS1	0.016055	glycine	0.122598	3.72924e-20
rs2287598	2	211523163	G	A	-0.166427	0.0789353	0.0413798	intron	CPS1	0.100153	glycine	0.106653	2.35713e-19
rs6435580	2	211523457	C	T	-0.050399	0.0511072	0.340076	intron	CPS1	0.38341	glycine	0.409391	1.29155e-19
rs41272671	2	211525420	A	G	-0.351825	0.149677	0.022967	intron	CPS1	0.0283091	glycine	0.149258	2.06739e-19
rs7567836	2	211528001	T	C	0.10727	0.0830679	0.211563	intron	CPS1	0.101682	glycine	0.725646	2.29102e-19
rs10932347	2	211533070	G	A	-0.354992	0.149669	0.0217577	intron	CPS1	0.0282875	glycine	0.142902	4.6517e-19
rs1047891	2	211540507	C	A	0.613508	0.0565325	8.75485e-26	missense	CPS1	0.243502	glycine	8.07244e-09	0.404718
rs41272673	2	211541721	A	G	-0.20781	0.085571	0.018804	intron	CPS1	0.0867737	glycine	0.950566	1.55751e-18
rs17832175	2	211542525	A	G	-0.296109	0.0813005	0.000425886	intron	CPS1	0.0957854	glycine	0.0971317	4.05459e-17
rs137960636	2	217364013	C	T	0.0490259	0.106099	0.644566	coding-synonymous	RPL37A	0.044759	pyruvate	0.682695	3.79069e-05	0.00263158
rs77309431	2	217364448	G	A	0.0653527	0.117647	0.579174	intron	RPL37A	0.0401376	pyruvate	0.457111	3.2488e-05
rs284573	2	217364452	C	G	-0.0659994	0.0492506	0.180931	intron	RPL37A	0.324159	pyruvate	0.286082	5.14352e-05
rs284572	2	217364539	T	C	0.0348693	0.0532137	0.512982	intron	RPL37A	0.246942	pyruvate	0.443373	3.39588e-05
rs3770473	2	217498839	T	G	0.0592291	0.0510763	0.246973	intron	IGFBP2	0.27697	pyruvate	0.614672	6.43461e-05
rs9341195	2	217524323	G	A	-0.0943385	0.0890055	0.289967	intron	IGFBP2	0.0749235	pyruvate	0.529628	5.34124e-05
rs114544492	2	217524623	T	G	0.18148	0.155703	0.244563	intron	IGFBP2	0.0210245	pyruvate	0.23017	3.42761e-05
rs9341197	2	217524635	A	T	0.0752255	0.134978	0.577931	intron	IGFBP2	0.029052	pyruvate	0.563999	3.65873e-05
rs9341201	2	217525243	T	C	0.075778	0.100641	0.452213	intron	IGFBP2	0.0490046	pyruvate	0.316703	3.06962e-05
rs9341206	2	217526521	C	T	-0.0283446	0.143797	0.843988	intron	IGFBP2	0.0256116	pyruvate	0.840886	3.71979e-05
rs9341207	2	217526553	G	A	0.000317958	0.132336	0.998086	intron	IGFBP2	0.0286697	pyruvate	0.626379	3.28753e-05
rs9341218	2	217528609	A	G	0.116408	0.123708	0.347494	intron	IGFBP2	0.0329755	pyruvate	0.313577	3.79786e-05
rs6413492	2	217528951	T	A	-0.0186868	0.136856	0.891567	utr-3	IGFBP2	0.0256508	pyruvate	0.931074	3.75524e-05
rs11575205	2	217541426	C	T	-0.100703	0.139467	0.470983	utr-3	IGFBP5	0.0264165	pyruvate	0.47616	3.9247e-05
rs11575204	2	217541437	G	A	-0.053877	0.145227	0.711099	utr-3	IGFBP5	0.0252294	pyruvate	0.700468	3.6974e-05
rs6746360	2	217543541	T	C	-0.0215886	0.137208	0.875176	intron	IGFBP5	0.0301988	pyruvate	0.877989	3.72661e-05
rs11575195	2	217543633	G	A	-0.053877	0.145227	0.711099	coding-synonymous	IGFBP5	0.0248471	pyruvate	0.700468	3.6974e-05
rs11575194	2	217543728	G	A	-0.0124232	0.115815	0.914715	missense	IGFBP5	0.0409021	pyruvate	0.903891	3.71973e-05
rs139288422	2	217543783	G	A	0.0680945	0.142007	0.632127	coding-synonymous	IGFBP5	0.0267584	pyruvate	0.537934	3.41686e-05
rs2173012	5	78076160	C	T	-0.168101	0.142247	0.246703	utr-3	ARSB	0.0252487	dimethyl-glycine	0.232594	1.57642e-13	0.00119048
rs3822473	5	78076517	G	C	-0.0933535	0.110403	0.407183	intron	ARSB	0.0470543	dimethyl-glycine	0.908321	2.28712e-13
rs34152768	5	78111674	A	G	0.0533364	0.0555541	0.346651	intron	ARSB	0.204058	dimethyl-glycine	0.384789	1.64058e-13
rs25413	5	78135201	C	T	-0.0773794	0.0539331	0.159613	coding-synonymous	ARSB	0.208875	dimethyl-glycine	0.871486	4.20769e-13
rs25414	5	78135241	C	T	-0.283868	0.132567	0.0358173	missense	ARSB	0.0306044	dimethyl-glycine	0.0826926	3.00083e-13
rs25415	5	78135276	T	G	0.0411805	0.0457826	0.377938	intron	ARSB	0.414308	dimethyl-glycine	0.785033	2.21523e-13
rs1071598	5	78181423	C	T	0.106258	0.0538265	0.0529812	missense	ARSB	0.228386	dimethyl-glycine	0.770965	9.76618e-13
rs1065757	5	78181477	C	T	0.0759305	0.0475307	0.117365	missense	ARSB	0.385616	dimethyl-glycine	0.0502002	7.172e-14
rs72762973	5	78181577	T	C	0.165689	0.0718578	0.0238079	coding-synonymous	ARSB	0.115532	dimethyl-glycine	0.00196348	1.67849e-14
rs6870443	5	78251347	A	G	-0.0504007	0.054186	0.361895	intron	ARSB	0.201607	dimethyl-glycine	0.935874	2.50194e-13
rs61216659	5	78264684	C	G	-0.0616129	0.0539634	0.26306	intron	ARSB	0.197237	dimethyl-glycine	0.931966	3.26798e-13
rs3733895	5	78265041	A	G	0.157648	0.0459014	0.000760994	intron	ARSB	0.401991	dimethyl-glycine	0.152098	1.35009e-11
rs58686906	5	78296755	T	G	-0.0848236	0.073584	0.258493	intron	DMGDH	0.103673	dimethyl-glycine	0.530867	2.51448e-13
rs41272264	5	78301326	A	G	-0.040784	0.069853	0.567108	intron	DMGDH	0.103382	dimethyl-glycine	0.922067	2.42128e-13
rs731124	5	78317413	C	T	-0.237681	0.04785	1.12148e-06	intron	DMGDH	0.372992	dimethyl-glycine	0.0108172	4.08701e-10
rs2303128	5	78320085	T	C	0.139293	0.120518	0.25724	intron	DMGDH	0.0405509	dimethyl-glycine	0.16284	1.22464e-13
rs1805074	5	78324352	A	G	-0.237681	0.04785	1.12148e-06	missense	DMGDH	0.372992	dimethyl-glycine	0.0108172	4.08701e-10
rs2303129	5	78324482	T	C	-0.237681	0.04785	1.12148e-06	intron	DMGDH	0.372992	dimethyl-glycine	0.0108172	4.08701e-10
rs41272268	5	78325879	T	C	-0.0796457	0.0939915	0.406187	intron	DMGDH	0.0646519	dimethyl-glycine	0.815744	2.48602e-13
rs1805073	5	78326750	G	C	-0.237681	0.04785	1.12148e-06	missense	DMGDH	0.372992	dimethyl-glycine	0.0108172	4.08701e-10
rs1805072	5	78328560	G	A	-0.220524	0.0552047	9.01376e-05	coding-synonymous	DMGDH	0.219587	dimethyl-glycine	0.0167494	1.27915e-11
rs248384	5	78340062	C	T	0.0508317	0.0470043	0.28912	intron	DMGDH	0.494644	dimethyl-glycine	0.0628212	4.80659e-14
rs248385	5	78340257	G	C	0.0508317	0.0470043	0.28912	coding-synonymous	DMGDH	0.494644	dimethyl-glycine	0.0628212	4.80659e-14
rs532964	5	78340286	G	A	0.0508317	0.0470043	0.28912	missense	DMGDH	0.494644	dimethyl-glycine	0.0628212	4.80659e-14
rs531982	5	78340411	T	C	-0.0714313	0.046461	0.131795	intron	DMGDH	0.464805	dimethyl-glycine	0.209993	2.18097e-13
rs2249096	5	78340517	T	A	0.0539664	0.0445622	0.235188	intron	DMGDH	0.498074	dimethyl-glycine	0.115017	9.33716e-14
rs6873326	5	78351512	T	C	-0.125049	0.0630598	0.0519154	intron	DMGDH	0.15417	dimethyl-glycine	0.570262	9.48534e-13
rs2272038	5	78351607	G	C	0.148827	0.121484	0.229806	intron	DMGDH	0.0401683	dimethyl-glycine	0.148847	1.23118e-13
rs2253262	5	78351636	C	A	0.144915	0.048431	0.00335643	coding-synonymous	DMGDH	0.332058	dimethyl-glycine	0.20155	4.53965e-12
rs7718728	5	78365852	A	G	-0.127762	0.061739	0.0425114	intron	BHMT2	0.153965	dimethyl-glycine	0.486291	2.13013e-12
rs682985	5	78373431	T	C	0.0868365	0.0441772	0.0540059	coding-synonymous	BHMT2	0.376723	dimethyl-glycine	0.0830997	2.34526e-13
rs41272270	5	78378824	C	T	-0.125328	0.0632074	0.0519412	intron	BHMT2	0.149808	dimethyl-glycine	0.566754	8.71263e-13
rs56047138	5	78407805	C	T	-0.124181	0.0586202	0.0378452	intron	BHMT	0.154497	dimethyl-glycine	0.479953	1.15492e-12
rs619100	5	78411822	C	G	-0.0743138	0.0444579	0.101314	intron	BHMT	0.449425	dimethyl-glycine	0.384531	4.74526e-13
rs567754	5	78416416	C	T	-0.0738411	0.0489034	0.138848	intron	BHMT	0.322112	dimethyl-glycine	0.975151	5.11006e-13
rs59121233	5	78416868	G	A	0.107665	0.101066	0.296378	intron	BHMT	0.0469231	dimethyl-glycine	0.215219	1.38018e-13
rs201086861	5	78417012	A	G	0.107257	0.139121	0.449817	intron	BHMT	0.0248851	dimethyl-glycine	0.292303	1.24859e-13
rs59866108	5	78417158	G	A	0.109909	0.173549	0.534742	missense	BHMT	0.0153022	dimethyl-glycine	0.94691	2.09477e-13
rs694290	5	78421780	A	G	0.188042	0.0490882	0.000173346	intron	BHMT	0.297141	dimethyl-glycine	0.29057	6.79047e-11
rs3733890	5	78421959	G	A	-0.152637	0.0478791	0.00177826	missense	BHMT	0.328998	dimethyl-glycine	0.048811	2.80741e-12
rs73769979	5	78426729	C	G	0.176835	0.111206	0.119062	intron	BHMT	0.0470543	dimethyl-glycine	0.0789591	1.20597e-13
rs585800	5	78427208	A	T	0.276654	0.0506483	8.58926e-08	utr-3	BHMT	0.208817	dimethyl-glycine	0.01504	2.45215e-08
rs1459996	10	61007534	G	A	-0.156062	0.0639057	0.0151115	intron	PHYHIPL,FAM13C	0.158116	carnitine	0.176147	2.08377e-09	0.00263158
rs12268908	10	61011325	C	T	-0.17721	0.11378	0.121242	intron	FAM13C	0.0386677	carnitine	0.690509	1.0019e-09
rs1903252	10	61014056	A	C	-0.0860529	0.0618509	0.166284	intron	FAM13C	0.17611	carnitine	0.646992	7.47931e-10
10:61028354	10	61028354	G	A	-0.33273	0.170515	0.0522054	missense	FAM13C	0.020291	carnitine	0.531265	1.71717e-09
rs41283702	10	61028477	G	A	-0.25833	0.138415	0.0633273	intron	FAM13C	0.0238645	carnitine	0.182457	1.13639e-09
rs12257689	10	61043051	G	A	-0.177311	0.149027	0.236509	intron	FAM13C	0.0225881	carnitine	0.512541	5.48604e-10
rs61738820	10	61043244	G	A	0.0437266	0.075924	0.566641	intron	FAM13C	0.106432	carnitine	0.667722	3.70153e-10
rs72808548	10	61062538	T	C	-0.139156	0.057935	0.0168596	intron	FAM13C	0.198315	carnitine	0.126708	1.68189e-09
rs284614	10	61120684	C	T	0.0909899	0.0674144	0.179315	intron	FAM13C	0.123367	carnitine	0.467278	3.96752e-10
rs11006451	10	61120718	A	G	-0.16094	0.107152	0.135079	intron	FAM13C	0.0486963	carnitine	0.7368	7.51518e-10
rs12356193	10	61413353	A	G	-0.308803	0.0576914	1.00656e-07	intron	SLC16A9	0.202144	carnitine	0.168963	0.000130434
rs2242206	10	61414011	G	T	0.12771	0.0526081	0.0157234	missense	SLC16A9	0.259571	carnitine	0.470748	4.15297e-09
rs56370926	10	61414176	G	A	-0.142547	0.0887007	0.109839	missense	SLC16A9	0.073124	carnitine	0.967149	1.12105e-09
rs7071865	10	61443751	T	C	0.0619449	0.06912	0.37258	intron	SLC16A9	0.132083	carnitine	0.408216	3.40921e-10
rs1171660	10	61443808	A	G	0.14042	0.0496896	0.00492926	intron	SLC16A9	0.316233	carnitine	0.53865	1.15902e-08
rs34715719	10	61444091	C	T	-0.000149812	0.059086	0.997987	intron	SLC16A9	0.193721	carnitine	0.201111	1.51223e-10
rs74152113	10	61444100	A	G	0.123901	0.116124	0.288433	intron	SLC16A9	0.0432619	carnitine	0.933517	5.86548e-10
rs1171656	10	61446550	T	A	-0.152006	0.0476139	0.00149177	intron	SLC16A9	0.36051	carnitine	0.110883	1.65538e-08
rs1171655	10	61446633	T	C	0.037299	0.0629469	0.555497	intron	SLC16A9	0.169739	carnitine	0.05097	4.68118e-11
rs56294631	16	67472255	G	C	-0.0979349	0.132966	0.471974	utr-3	ATP6V0D1	0.024207	lysine	0.162077	6.18946e-08	0.000581395
rs115868653	16	67654512	C	G	0.0966064	0.141829	0.505938	intron	CTCF	0.0299539	lysine	0.943244	2.43016e-08
rs143837268	16	67654677	C	T	0.115636	0.146231	0.439975	coding-synonymous	CTCF	0.0284178	lysine	0.914461	2.61934e-08
rs146836745	16	67655247	C	G	0.106274	0.0987315	0.293188	intron	CTCF	0.0507302	lysine	0.796638	3.71721e-08
16:67655665	16	67655665	T	C	-0.167277	0.159609	0.306088	intron	CTCF	0.0174468	lysine	0.208691	4.81348e-10
rs149149637	16	67656027	A	G	-0.0489668	0.258185	0.853064	intron	CTCF	0.0283019	lysine	0.395297	0.237216
rs111743037	16	67671525	A	G	-0.0432539	0.135858	0.755868	intron	CTCF	0.0241935	lysine	0.349618	1.28898e-08
rs6499137	16	67671804	T	G	-0.0472196	0.0855084	0.589699	utr-3	CTCF	0.0794931	lysine	0.0955758	5.31254e-09
rs147343788	16	67909800	T	C	0.0539421	0.118933	0.657828	intron	EDC4	0.0326421	lysine	0.770044	1.98234e-08
rs8060686	16	67911517	T	C	0.0777384	0.0588705	0.197212	coding-synonymous	EDC4	0.176267	lysine	0.725485	4.03101e-08
rs8061384	16	67911874	T	G	0.0455216	0.104274	0.669873	intron	EDC4	0.0441628	lysine	0.612724	1.80541e-08
rs80281232	16	67913918	A	C	-0.168145	0.104864	0.117379	intron	EDC4	0.0529954	lysine	0.604207	5.22615e-08
rs117539386	16	67916047	C	G	0.0539421	0.118933	0.657828	intron	EDC4	0.0326421	lysine	0.770044	1.98234e-08
rs145920378	16	67916271	T	C	0.0539421	0.118933	0.657828	intron	EDC4	0.0326421	lysine	0.770044	1.98234e-08
rs34607252	16	67917958	G	A	-0.325452	0.142339	0.0255594	coding-synonymous	EDC4	0.0280553	lysine	0.193608	1.18273e-07
rs5923	16	67973953	G	A	0.0251686	0.108065	0.82008	coding-synonymous	LCAT	0.0422427	lysine	0.517892	1.58993e-08
rs4986970	16	67976320	A	T	0.141808	0.107944	0.199522	missense	LCAT	0.0460829	lysine	0.661636	3.79712e-08
16:67976822	16	67976822	G	A	-0.0889331	0.126638	0.492843	coding-synonymous	LCAT	0.0337942	lysine	0.378555	1.63564e-08
rs2305811	16	68321859	G	A	0.0231945	0.0750405	0.76277	intron	SLC7A6	0.0913978	lysine	0.739246	2.00298e-08
rs2305810	16	68321878	C	A	0.0791822	0.061747	0.210462	intron	SLC7A6	0.15553	lysine	0.928274	4.44966e-08
rs150599161	16	68321923	T	C	-0.0780384	0.173358	0.660226	intron	SLC7A6	0.019216	lysine	0.356911	1.45477e-08
rs55856208	16	68324210	A	T	0.134859	0.0647427	0.0419358	intron	SLC7A6	0.140937	lysine	0.468547	1.26024e-07
16:68324503	16	68324503	C	T	-0.0538362	0.152232	0.729829	intron	SLC7A6	0.0218894	lysine	0.291538	1.15622e-08
16:68325667	16	68325667	T	G	0.1719	0.158359	0.28912	intron	SLC7A6	0.0264207	lysine	0.601852	4.82336e-06
rs74024440	16	68330989	G	A	0.0950637	0.114234	0.416407	intron	SLC7A6	0.0376344	lysine	0.847941	2.52931e-08
rs11350	16	68335392	T	C	0.145813	0.0649919	0.028455	utr-3	SLC7A6,SLC7A6OS	0.140553	lysine	0.379538	1.58156e-07
rs35736950	16	68336360	A	G	-0.241421	0.0722386	0.00109994	coding-synonymous	SLC7A6OS	0.110599	lysine	0.508027	2.59828e-06
rs11548855	16	68337948	T	C	0.177295	0.137676	0.208546	missense	SLC7A6OS	0.0262954	lysine	0.608071	4.15058e-08
rs8063446	16	68344363	A	C	0.14923	0.0653089	0.0256544	missense	SLC7A6OS	0.138249	lysine	0.353051	1.61349e-07
rs3803650	16	68344696	T	C	-0.180073	0.0446444	8.18515e-05	missense	SLC7A6OS	0.460829	lysine	0.895341	2.78629e-05
rs1965308	16	68355181	T	A	-0.170337	0.0422511	8.25023e-05	intron	PRMT7	0.470224	lysine	0.984761	8.58435e-06
rs11649625	16	68358788	A	G	-0.143273	0.115166	0.22441	intron	PRMT7	0.0418587	lysine	0.0320021	3.68247e-09
rs2290698	16	68362809	A	G	-0.167157	0.0416401	8.84754e-05	intron	PRMT7	0.456776	lysine	0.996035	2.25475e-05
rs138763605	16	68371469	G	A	-0.100818	0.125483	0.432689	missense	PRMT7	0.0341782	lysine	0.452339	1.94459e-08
rs12920348	16	68371591	A	G	0.0351313	0.117634	0.770556	intron	PRMT7	0.0349379	lysine	0.672924	3.41433e-08
rs12926948	16	68373428	C	T	0.0687643	0.185806	0.717794	coding-synonymous	PRMT7	0.015361	lysine	0.890148	2.0335e-08
rs7190134	16	68381516	G	A	0.165601	0.0644756	0.0121349	intron	PRMT7	0.141705	lysine	0.240152	2.42292e-07
rs2307022	16	68381978	G	A	-0.237158	0.0454784	3.53444e-07	intron	PRMT7	0.359231	lysine	0.570359	0.00516827
rs79543001	16	68387341	C	T	0.157286	0.0701632	0.0285857	intron	PRMT7	0.115207	lysine	0.334255	1.2851e-07
rs1562479	16	68387373	C	T	0.157244	0.0455689	0.000752307	intron	PRMT7	0.485407	lysine	0.743825	3.07242e-06
rs61746794	16	68387457	C	T	0.170581	0.0642183	0.00948723	coding-synonymous	PRMT7	0.142089	lysine	0.209844	2.70054e-07
rs1868159	16	68387496	C	A	-0.272662	0.0476003	2.22101e-08	intron	PRMT7	0.333717	lysine	0.317715	0.0466063
rs1131933	16	68389772	C	T	0.0948632	0.0459893	0.043972	coding-synonymous	PRMT7	0.390469	lysine	0.309362	7.51971e-08
rs12934423	16	68390386	C	T	0.085165	0.114863	0.469026	intron	PRMT7	0.0364341	lysine	0.783249	9.19122e-08
rs61733486	16	68390697	C	T	0.107972	0.0947554	0.26581	coding-synonymous	PRMT7	0.0638462	lysine	0.764593	3.53855e-08
rs36087213	16	68394763	C	T	0.0191476	0.115829	0.871752	utr-3	SMPD3	0.0316931	lysine	0.709859	3.99916e-08
rs2279540	16	68395061	T	C	0.167386	0.0639051	0.0105312	utr-3	SMPD3	0.142473	lysine	0.225857	2.58104e-07
rs2279539	16	68395094	G	A	0.154914	0.0456504	0.000919949	utr-3	SMPD3	0.484639	lysine	0.68615	2.49534e-06
rs71393993	16	68395313	G	A	-0.0321162	0.125633	0.802865	intron	SMPD3	0.0315871	lysine	0.44401	2.64829e-08
rs71395853	16	68395522	C	T	-0.00795384	0.138154	0.955165	missense	SMPD3	0.0303379	lysine	0.526372	1.60642e-08
rs56899435	16	68395675	G	A	0.193258	0.0640049	0.00319185	intron	SMPD3	0.150922	lysine	0.13438	4.01507e-07
rs3743743	16	68397775	C	T	0.170581	0.0642183	0.00948723	intron	SMPD3	0.142198	lysine	0.209844	2.70054e-07
rs138213621	16	68397776	G	A	-0.20381	0.170849	0.244039	intron	SMPD3	0.0176787	lysine	0.973451	3.61143e-08
rs1465470	16	68397909	G	A	-0.272662	0.0476003	2.22101e-08	intron	SMPD3	0.333974	lysine	0.317715	0.0466063
rs1465469	16	68397916	G	T	-0.149043	0.0454756	0.00137151	intron	SMPD3	0.485396	lysine	0.444353	1.52407e-06
rs73615919	16	68398862	C	T	0.192585	0.0640047	0.00329953	intron	SMPD3	0.151154	lysine	0.13666	4.26799e-07
rs146266629	16	68398909	G	A	0.143053	0.137037	0.308002	intron	SMPD3	0.0257692	lysine	0.584582	3.249e-08
rs1868158	16	68398924	T	C	-0.153444	0.0455667	0.00100721	coding-synonymous	SMPD3	0.483846	lysine	0.486892	2.09014e-06
rs36121552	16	68399102	T	G	0.0307803	0.141472	0.83174	intron	SMPD3	0.0269742	lysine	0.706399	1.42011e-08
rs111346792	16	68404664	C	T	0.0182564	0.156258	0.909162	intron	SMPD3	0.0203602	lysine	0.184578	5.19283e-09
rs1182968	16	68573945	T	C	-0.0210729	0.0496368	0.678445	intron	ZFP90	0.304615	lysine	0.760337	2.45399e-08
rs1170442	16	68574064	T	G	-0.00743016	0.0478912	0.879574	intron	ZFP90	0.306626	lysine	0.611426	1.98337e-08
rs17621931	16	68574096	A	T	0.0432028	0.0750651	0.574087	intron	ZFP90	0.0820837	lysine	0.474559	9.32799e-08
rs11860220	16	68591715	T	G	0.0194271	0.0743337	0.798552	intron	ZFP90	0.104455	lysine	0.920116	2.03001e-08
rs75130703	16	68592332	C	T	0.115464	0.0947311	0.233937	intron	ZFP90	0.0610599	lysine	0.696195	3.70602e-08
rs11648314	16	68596775	C	T	-0.00757195	0.0479607	0.877471	intron	ZFP90	0.285824	lysine	0.873377	1.86031e-08
rs1177648	16	68598007	G	A	0.00880712	0.0472121	0.85545	coding-synonymous	ZFP90	0.389401	lysine	0.670632	1.80527e-08
rs3743674	16	68771372	T	C	0.154159	0.0660252	0.0226016	intron	CDH1	0.122093	lysine	0.163227	8.70393e-08
rs33963999	16	68842480	G	C	-0.129364	0.128909	0.327086	intron	CDH1	0.0326421	lysine	0.547285	2.45351e-08
rs8059087	16	68844836	T	C	0.0673964	0.416056	0.874307	intron	CDH1	0.016129	lysine	0.375839	0.0303484
rs200876695	16	68845894	G	A	0.0959473	0.12534	0.454734	intron	CDH1	0.0369515	lysine	0.654503	4.5635e-08
rs9935130	16	68847576	A	G	0.13313	0.121144	0.283193	intron	CDH1	0.0342045	lysine	0.596834	2.8748e-08
rs8056633	16	68847584	T	G	0.132279	0.0549963	0.0188325	intron	CDH1	0.216872	lysine	0.353321	2.23023e-07
rs9934882	16	68853103	C	G	-0.0548509	0.103543	0.604932	intron	CDH1	0.0526114	lysine	0.655467	2.0317e-08
rs34582129	16	68855852	G	C	-0.0360488	0.186285	0.850111	intron	CDH1	0.0192012	lysine	0.377461	1.33229e-08
rs33969373	16	68856088	C	T	-0.0964735	0.106477	0.376262	coding-synonymous	CDH1	0.0503072	lysine	0.826909	2.77573e-08
rs2276330	16	68857289	T	C	0.116246	0.0831874	0.172367	intron	CDH1	0.0887097	lysine	0.498004	3.90699e-08
rs1801552	16	68857441	C	T	-0.0542624	0.0475196	0.264799	coding-synonymous	CDH1	0.366743	lysine	0.424433	2.56586e-08
rs33964119	16	68862165	C	T	0.0665418	0.153278	0.671606	coding-synonymous	CDH1	0.0211376	lysine	0.706654	2.58726e-08
rs33965115	16	68863752	G	A	0.0389971	0.093426	0.683549	intron	CDH1	0.0568356	lysine	0.667825	1.86779e-08
rs2012923	16	68863862	C	T	0.107165	0.066797	0.117179	intron	CDH1	0.146082	lysine	0.291252	6.46739e-09
rs2012924	16	68863863	T	C	0.194085	0.0886546	0.0325256	intron	CDH1	0.0990836	lysine	0.148767	3.03317e-05
16:68863864	16	68863864	T	C	-0.12673	0.170609	0.468212	intron	CDH1	0.020475	lysine	0.232948	9.83985e-08
rs139757930	16	68867187	C	G	-0.0853991	0.119685	0.485928	intron	CDH1	0.037279	lysine	0.409236	1.74367e-08
rs2229044	16	68867387	C	T	-0.0964735	0.106477	0.376262	coding-synonymous	CDH1	0.0503072	lysine	0.826909	2.77573e-08
rs1801026	16	68867456	C	T	0.0411319	0.0663057	0.544654	utr-3	CDH1	0.152458	lysine	0.466587	1.79713e-08
rs34408089	17	68128417	C	T	0.0739248	0.174542	0.67345	coding-synonymous	KCNJ16	0.0207533	3-hydroxybutyrate	0.585612	1.72735e-05	0.025
rs173135	17	68172326	C	T	0.401954	0.0761404	1.49871e-07	utr-3	KCNJ2	0.106457	3-hydroxybutyrate	0.0024626	0.310709
rs62239019	22	18560825	A	G	-0.102814	0.076794	0.197292	utr-5	PEX26	0.104151	proline	0.0579145	4.57778e-10	0.00119048
rs464541	22	18562888	T	C	0.00282355	0.0562892	0.961472	intron	PEX26	0.218846	proline	0.566284	8.6072e-10
rs12484657	22	18566288	C	G	0.270543	0.185112	0.159295	missense	PEX26	0.0176787	proline	0.0985576	7.23277e-10
rs464385	22	18571008	A	G	0.0314117	0.0508467	0.551896	utr-3	PEX26	0.364719	proline	0.312308	9.32692e-10
rs383964	22	18900669	G	A	0.0237517	0.0862042	0.790751	utr-3	PRODH	0.0726923	proline	0.671608	1.10873e-09
rs372055	22	18900750	A	G	0.100847	0.0639791	0.129029	coding-synonymous	PRODH	0.149885	proline	0.0597457	5.10071e-10
rs16983347	22	18900868	G	A	0.213775	0.111945	0.0659159	coding-synonymous	PRODH	0.0411538	proline	0.0346446	1.01479e-09
rs450046	22	18901004	T	C	0.0237517	0.0862042	0.790751	missense	PRODH	0.0730208	proline	0.671608	1.10873e-09
rs385440	22	18901090	G	A	0.0214566	0.0859019	0.809911	intron	PRODH	0.0728043	proline	0.692086	1.82412e-09
rs2904550	22	18905882	G	T	-0.101527	0.182675	0.592497	coding-synonymous	PRODH	0.0158423	proline	0.619355	3.44623e-09
rs1076466	22	18907124	G	A	-0.174296	0.049128	0.000634224	intron	PRODH	0.495	proline	6.09022e-06	1.2274e-11
rs9618419	22	18907405	G	T	-0.0302693	0.0723589	0.68706	intron	PRODH	0.125385	proline	0.861133	2.16869e-09
rs2008912	22	18910257	C	T	-0.203657	0.0490123	6.29426e-05	intron	PRODH	0.43774	proline	1.00808e-07	1.34359e-12
rs2008904	22	18910301	G	A	0.118838	0.0508308	0.0243578	intron	PRODH	0.408916	proline	0.0011903	5.07471e-11
rs2008903	22	18910307	A	G	0.118353	0.0509305	0.025231	intron	PRODH	0.408148	proline	0.00127513	5.2327e-11
rs5747933	22	18910355	G	T	0.881605	0.141183	1.81647e-09	missense	PRODH	0.0269024	proline	7.30212e-09	2.88751e-08
rs13058335	22	18910479	C	T	0.659822	0.0867919	2.45905e-13	intron	PRODH	0.074558	proline	1.1984e-05	0.431919
rs2277834	22	18910545	C	T	0.333475	0.0749391	1.82461e-05	intron	PRODH	0.114912	proline	5.01004e-06	3.81007e-10
rs2008878	22	18910756	G	C	0.106437	0.0511107	0.0449163	intron	PRODH	0.406154	proline	0.00273139	6.36329e-11
rs116760604	22	18910828	T	G	0.111756	0.0662565	0.104306	intron	PRODH	0.150546	proline	0.0508949	8.74972e-10
rs4269009	22	18910844	A	G	0.686883	0.145592	5.53723e-06	intron	PRODH	0.0223179	proline	1.23594e-05	9.41046e-09
rs2241305	22	18912429	A	G	0.123044	0.0908061	0.191929	intron	PRODH	0.0704931	proline	0.165824	1.97064e-09
rs11913840	22	18912677	C	T	-0.315488	0.11439	0.00790791	stop-gained	PRODH	0.0441968	proline	0.0206866	2.61861e-09
rs4819756	22	18912678	G	A	0.115174	0.0510262	0.0297309	missense	PRODH	0.407763	proline	0.00148787	5.26225e-11
rs11912152	22	18912779	T	C	-0.322546	0.113625	0.00626322	intron	PRODH	0.0446154	proline	0.0163001	4.39585e-09
rs11912082	22	18912852	C	T	-0.30303	0.112657	0.00958828	intron	PRODH	0.0448518	proline	0.0265982	2.60211e-09
rs112736533	22	18913051	G	A	-0.349983	0.114329	0.00319889	intron	PRODH	0.0441968	proline	0.00854081	2.84092e-09
rs111404325	22	18913277	C	G	-0.314548	0.114392	0.00809674	intron	PRODH	0.0442308	proline	0.0210041	4.20149e-09
rs17810231	22	18913312	G	A	-0.178999	0.0718585	0.0164467	intron	PRODH	0.12	proline	0.0663454	9.49419e-09
rs67269695	22	18918430	T	C	0.0887992	0.0808956	0.290468	intron	PRODH	0.0813492	proline	0.132625	2.37729e-09
rs67625420	22	18918760	T	C	0.0387906	0.0768964	0.627115	intron	PRODH	0.109147	proline	0.260618	7.0847e-10
rs16983593	22	18918825	T	C	-0.115783	0.159473	0.484444	intron	PRODH	0.0211376	proline	0.846581	1.38733e-09
rs3815653	22	18923524	G	A	0.21829	0.0873871	0.0161479	intron	PRODH	0.0661355	proline	0.00206666	4.23327e-10
rs1808323	22	18923585	C	G	0.216614	0.0894293	0.01967	intron	PRODH	0.0690738	proline	0.00279052	4.37949e-10
rs146648839	22	18923629	C	T	-0.188921	0.152635	0.233283	intron	PRODH	0.0218069	proline	0.486873	9.15363e-10
rs3815655	22	18923713	G	A	0.235378	0.0932083	0.015021	intron	PRODH	0.0655738	proline	0.00155658	4.22964e-10
rs2008720	22	18923745	G	T	-0.0588049	0.046809	0.226356	intron	PRODH	0.42224	proline	0.000501505	7.6874e-12
rs113812211	22	18923810	G	C	0.240983	0.0889741	0.00909994	intron	PRODH	0.0656525	proline	0.00119488	1.18163e-09
rs28750182	22	19164295	T	C	0.11217	0.121936	0.375684	intron	SLC25A1	0.0388163	proline	0.244644	8.40842e-10
rs3213491	22	19164835	A	C	0.380802	0.10877	0.00074764	intron	SLC25A1	0.0500385	proline	8.46896e-05	4.00017e-10
rs2070255	22	19165478	A	G	-0.0869397	0.0796866	0.293414	coding-synonymous	SLC25A1	0.0873749	proline	0.261085	1.8019e-09
rs8141941	22	19166263	G	A	-0.109614	0.0455532	0.020489	utr-5	SLC25A1	0.416796	proline	0.0587522	1.11764e-09
A1; affect allele, A2; other allele, beta; effect estimate, SE; standard error of beta, P-value a ; p value of the association between the SNP and the metabolite, P-value b ; p-value of the association between the SNP and the metabolite, adjusted by the GWAS SNP, P-value c ; p-value of the association between the GWAS SNP and the metabolite, adjusted by the SNP.*Loci in which the GWAS is explaine…
